# Supplementary material for: Controlling nanoparticle aggregation via gel point shift in the in situ photochemical synthesis of plasmonic epoxy-based nanocomposites
Source: Royal Society of Chemistry journal article supplement (doi:10.1039/d5nr03338a), 2025-11-24
Supplement: d5nr03338a1.pdf [file d5nr03338a1.pdf]

## Supplementary information

### Controlling nanoparticle aggregation via gel point shift in the in situ photochemical synthesis of plasmonic epoxy-based nanocomposites

*Agustina B. Leonardi<sup>a</sup>, Nancy M. Cativa<sup>a</sup>, Gustavo F. Arenas<sup>b</sup>, Marcelo Ceolín<sup>c</sup>,*

*Ignacio E. dell'Erba<sup>d,\*</sup>, and Walter F. Schroeder<sup>a,\*</sup>*

<sup>a</sup> Institute of Materials Science and Technology (INTEMA), University of Mar del Plata and National Research Council (CONICET), Av. Cristóbal Colón 10850, 7600 Mar del Plata, Argentina

<sup>b</sup> Laser Laboratory, Department of Physics, University of Mar del Plata and National Research Council (CONICET), Av. Juan B. Justo 4302, 7600 Mar del Plata, Argentina

<sup>c</sup> Instituto de Investigaciones Fisicoquímicas Teóricas y Aplicadas (INIFTA), Universidad Nacional de La Plata, CONICET, CC 16-Suc. 4, 1900 La Plata, Argentina

<sup>d</sup> Department of Chemistry and Biochemistry, Faculty of Exact and Natural Sciences, University of Mar del Plata, Deán Funes 3350, 7600 Mar del Plata, Argentina

\* Corresponding authors: [idedler@mdp.edu.ar](mailto:idedler@mdp.edu.ar) (I.E. dell'Erba)

[wschroeder@fi.mdp.edu.ar](mailto:wschroeder@fi.mdp.edu.ar) (W.F. Schroeder)

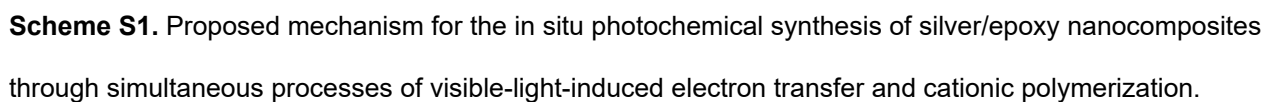

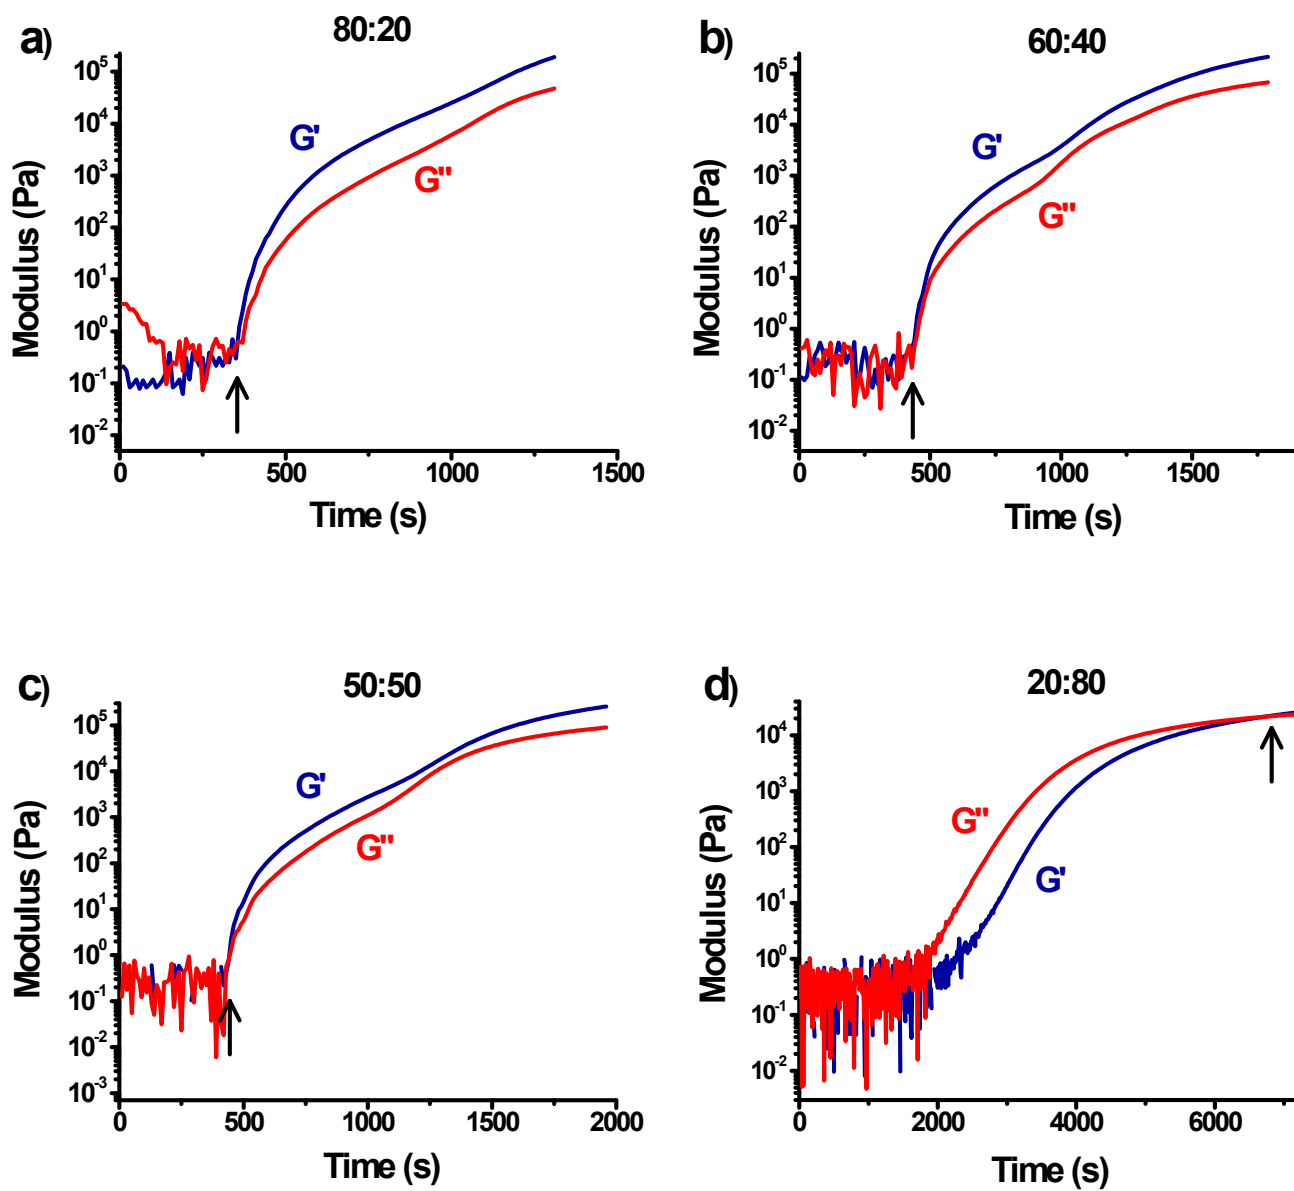

**Figure S1.** Evolution of the storage ( $G'$ ) and loss ( $G''$ ) moduli during the cationic ring-opening polymerization at 140 °C of blends with different DGEBA:PGE weight ratios: (a) 80:20; (b) 60:40; (c) 50:50 and (d) 20:80.

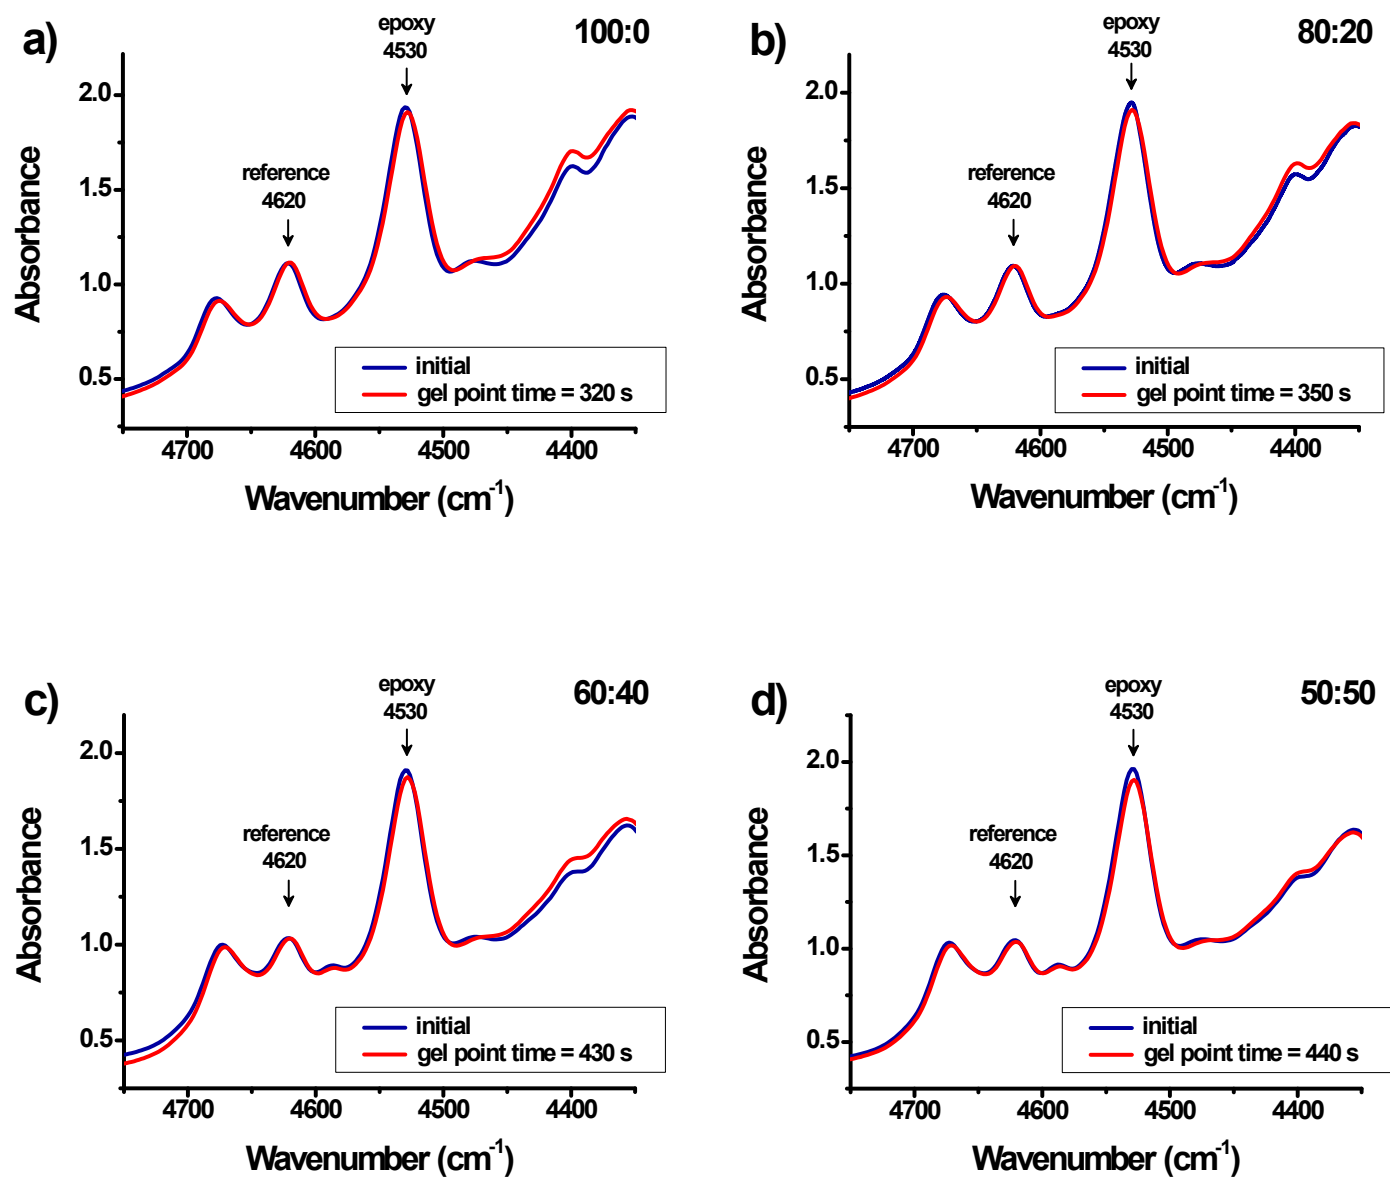

**Figure S2.** FTIR spectra recorded at the onset of the polymerization reaction at 140 °C and at the gel point for blends with different DGEBA:PGE weight ratios: (a) 100:0; (b) 80:20; (c) 60:40; and (d) 50:50.

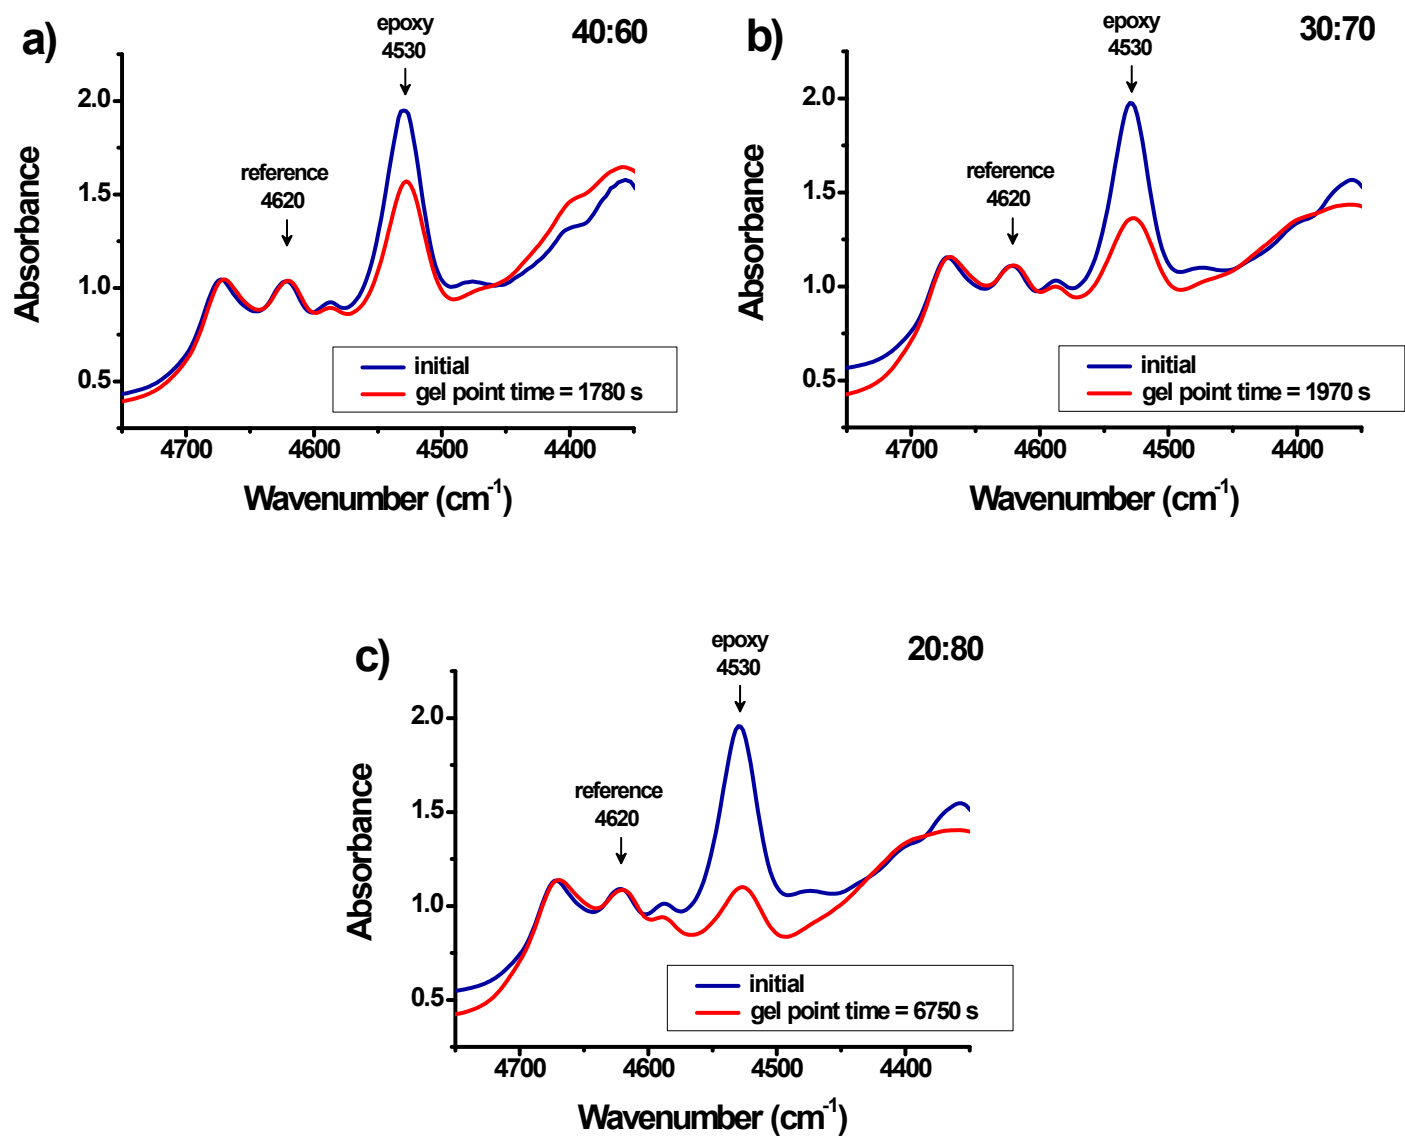

**Figure S3.** FTIR spectra recorded at the onset of the polymerization reaction at 140 °C and at the gel point for blends with different DGEBA:PGE weight ratios ratios: (a) 40:60; (b) 30:70; and (d) 20:80.

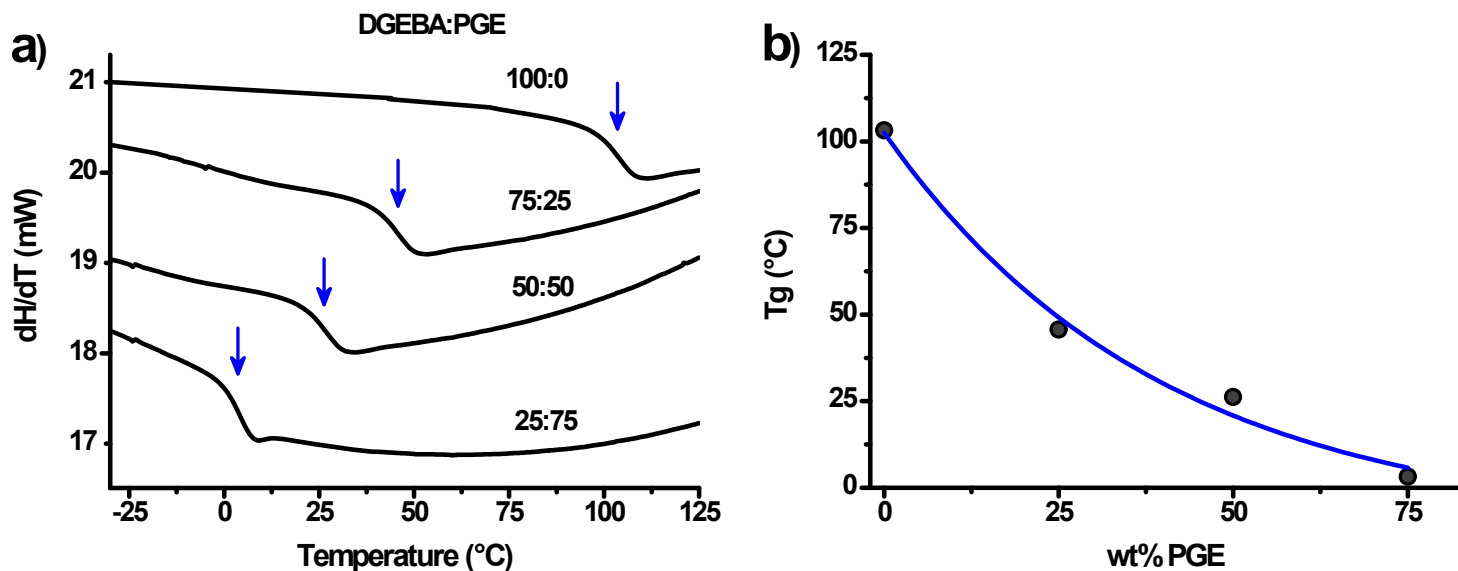

**Figure S4.** (a) Second heating DSC scans of silver/epoxy nanocomposites prepared with different DGEBA:PGE ratios. The blue arrow on each curve indicates the glass transition temperature ( $T_g$ ) of the epoxy matrix, defined as the midpoint of the transition. (b) Variation of  $T_g$  as a function of PGE content. DSC measurements were performed using a PerkinElmer Pyris 1 calorimeter under a dry nitrogen atmosphere. Samples ( $\sim 10$  mg) were first heated from  $20^{\circ}\text{C}$  to  $150^{\circ}\text{C}$  (first heating scan), then cooled to  $-50^{\circ}\text{C}$  (cooling scan), and finally heated again from  $-50^{\circ}\text{C}$  to  $150^{\circ}\text{C}$  (second heating scan). A heating/cooling rate of  $10^{\circ}\text{C}/\text{min}$  was used for all scans.

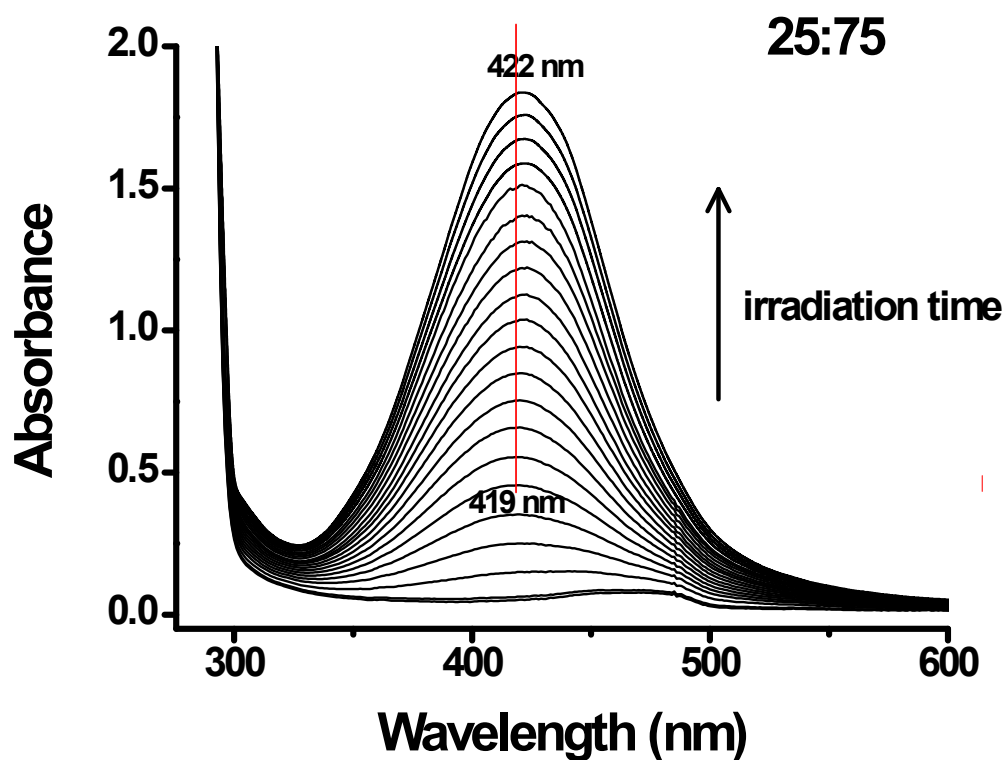

**Figure S5.** Evolution of the plasmon band of silver NPs during irradiation at room temperature for the sample formulated with a 25:75 DGEBA/PGE ratio. These UV–Vis spectra correspond to those in Figure 5b, where the saturated traces (indicated in red in that figure) were omitted and the absorbance scale was expanded. The red vertical line is included as a visual guide to highlight the small but systematic red-shift of  $\approx 3$  nm observed between 300 s and 1200 s of irradiation.

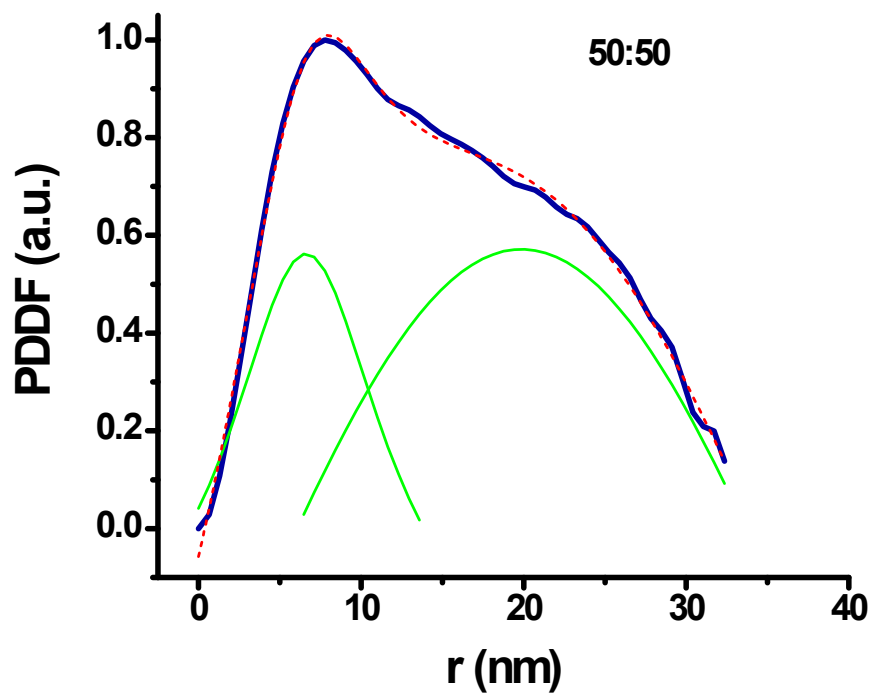

**Figure S6.** Deconvolution of the Pair-Distance Distribution Function (PDDF) for the silver/epoxy nanocomposite with a 50:50 DGEBA/PGE ratio. Blue curve: experimental PDDF; green curves: individual components from the deconvolution; red dashed curve: reconstructed PDDF obtained by summing the deconvoluted components.



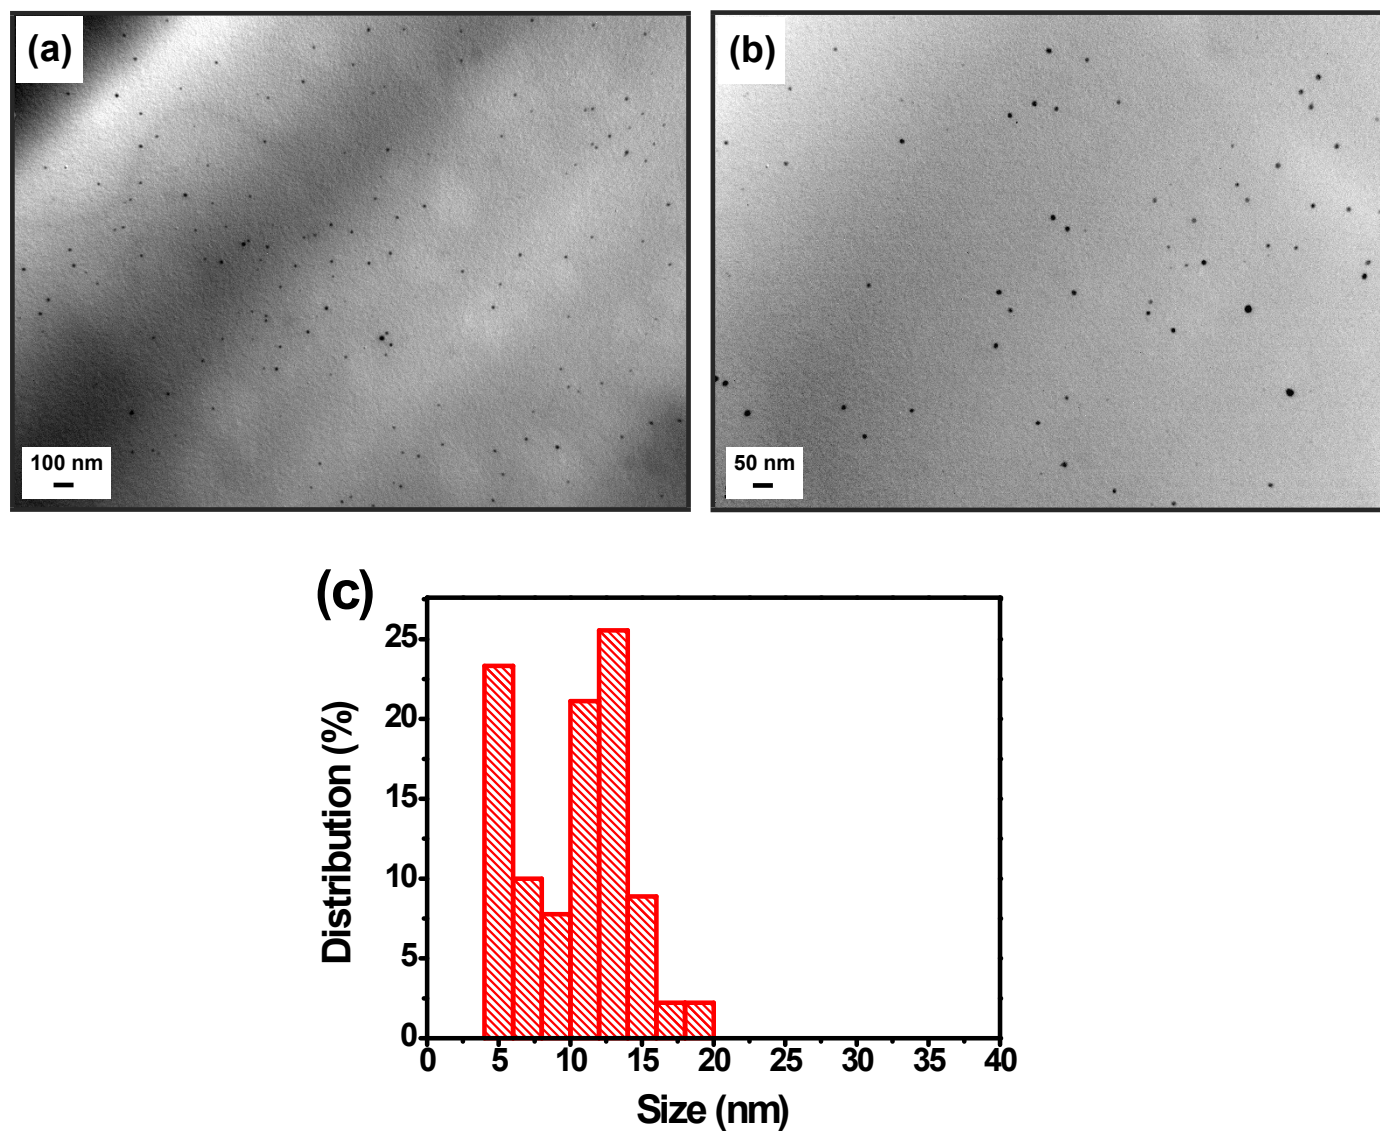

**Figure S7.** *Top:* TEM images of ultrathin sections from a sample with a 50:50 DGEBA/PGE ratio, shown at (a) lower magnification and (b) higher magnification. *Bottom (c):* Particle size distribution histogram obtained from TEM image analysis.

## Calculation of Pair Distance Distribution Functions (PDDFs)

The pair distance distribution functions (PDDFs) were calculated using the code embedded in SASView 3.1.2. Briefly, the PDDFs were obtained from the experimental scattering curves by applying an Indirect Fourier Transform (IFT) combined with regularization methods to ensure a smooth and physically meaningful PDDF( $r$ ) function, as described by D. I. Svergun (*J. Appl. Crystallogr.* 1992, **25**, 495-503). The non-negative regularization parameter ( $\alpha$ ) acted as a Lagrange multiplier, balancing the smoothness of PDDF( $r$ ) with the quality of the fit to the experimental data. The maximum correlation distance ( $r_{\text{max}}$ ) was adjusted to achieve a smooth decay of PDDF( $r$ ) to zero at large  $r$  values.

## Fitting of SAXS data

SAXS data were fitted using the SASfit software package in the  $q$ -region from 0.08 to 2 nm<sup>-1</sup>. The models used are implemented into the SASfit package and were used without modification (Kohlbrecher, J. *SASfit: A program for fitting simple structural models to small angle scattering data*. <https://kur.web.psi.ch/sans1/SANSSoft/sasfit.pdf>)

Data corresponding to the 100:0 sample were modeled assuming a factor form of spherical objects with a log-normal size distribution. Regarding the samples containing PGE, two contributions to the form factor were considered: one corresponding to spherical primary particles and the other to aggregated structures. A log-normal size distribution was assumed for each of these components.

**Table S1.** Fitting results of SAXS data for silver/epoxy nanocomposites formulated with different DGEBA/PGE ratios.

| DGEBA:PGE | Primary particles |                   |        |        | Aggregated structures |                   |        |         |
|-----------|-------------------|-------------------|--------|--------|-----------------------|-------------------|--------|---------|
|           | Form factor       | Size distribution |        |        | Form factor           | Size distribution |        |         |
|           | $\eta$            | $s$               | $p$    | $\mu$  | $\eta$                | $s$               | $p$    | $\mu$   |
| 100:0     | 0.0166            | 0.3391            | 4.0833 | 4.8245 | -                     | -                 | -      | -       |
| 50:50     | 0.0135            | 0.3224            | 5.7240 | 6.8564 | 0.0011                | 0.5139            | 3.1754 | 17.0795 |
| 40:60     | 0.0181            | 0.3757            | 3.7054 | 5.1753 | 0.0041                | 0.8214            | 3.7506 | 22.5986 |
| 30:70     | 0.0180            | 0.3716            | 3.6899 | 4.6166 | 0.0042                | 0.7364            | 3.6974 | 21.9101 |
| 25:75     | 0.0218            | 0.2558            | 4.4112 | 4.2470 | 0.0051                | 0.8864            | 3.4889 | 23.9016 |
